# Supplementary material for: Identification of Signatures of Selection by Whole-Genome Resequencing of a Chinese Native Pig
Source: Front Genet. 2020 Sep 17;11:566255. doi: 10.3389/fgene.2020.566255 (PMC7527633; doi:10.3389/fgene.2020.566255)
Supplement: Supplementary file 2 [file Table_2.XLS]

Chr : chromosome
Statrt: the start position of the selection region
End: the end position of the selection region
Fst: the Fst value of the start-end region
"¦È¦Ð,ratio: the ¦È¦Ð,ratio value of the start-end region"
